# Supplementary material for: The utility of cyclodextrins in lipase-catalyzed transesterification in organic solvents: enhanced reaction rate and enantioselectivityElectronic supplementary information (ESI) available: positive ion FAB mass spectrum of peracetylated cyclodextrin and details of gas-chromatographic separations of enantiomers. See http://www.rsc.org/suppdata/ob/b3/b301086d/
Source: Royal Society of Chemistry journal article supplement (doi:10.1039/b301086d), 2003-03-18
Supplement: b301086d.doc [file b301086d.doc]

Supplementary Material for Organic & Biomolecular Chemistry

This journal is © The Royal Society of Chemistry 2003

# Supplementary data

**The Utility of Cyclodextrins in Lipase-catalyzed Transesterification in Organic Solvents: Enhanced Reaction Rate and Enantioselectivity**

**Ashraf Ghanem**

Department of Organic Chemistry, University of Geneva, Quai Ernest Ansermet 30, CH-1211 Geneva 4, Switzerland.

Author e-mail: [ashraf.ghanem@chiorg.unige.ch](mailto:ashraf.ghanem@chiorg.unige.ch)

Phone: +41(0) 22-7026441, Fax: +41(0) 22-3442749


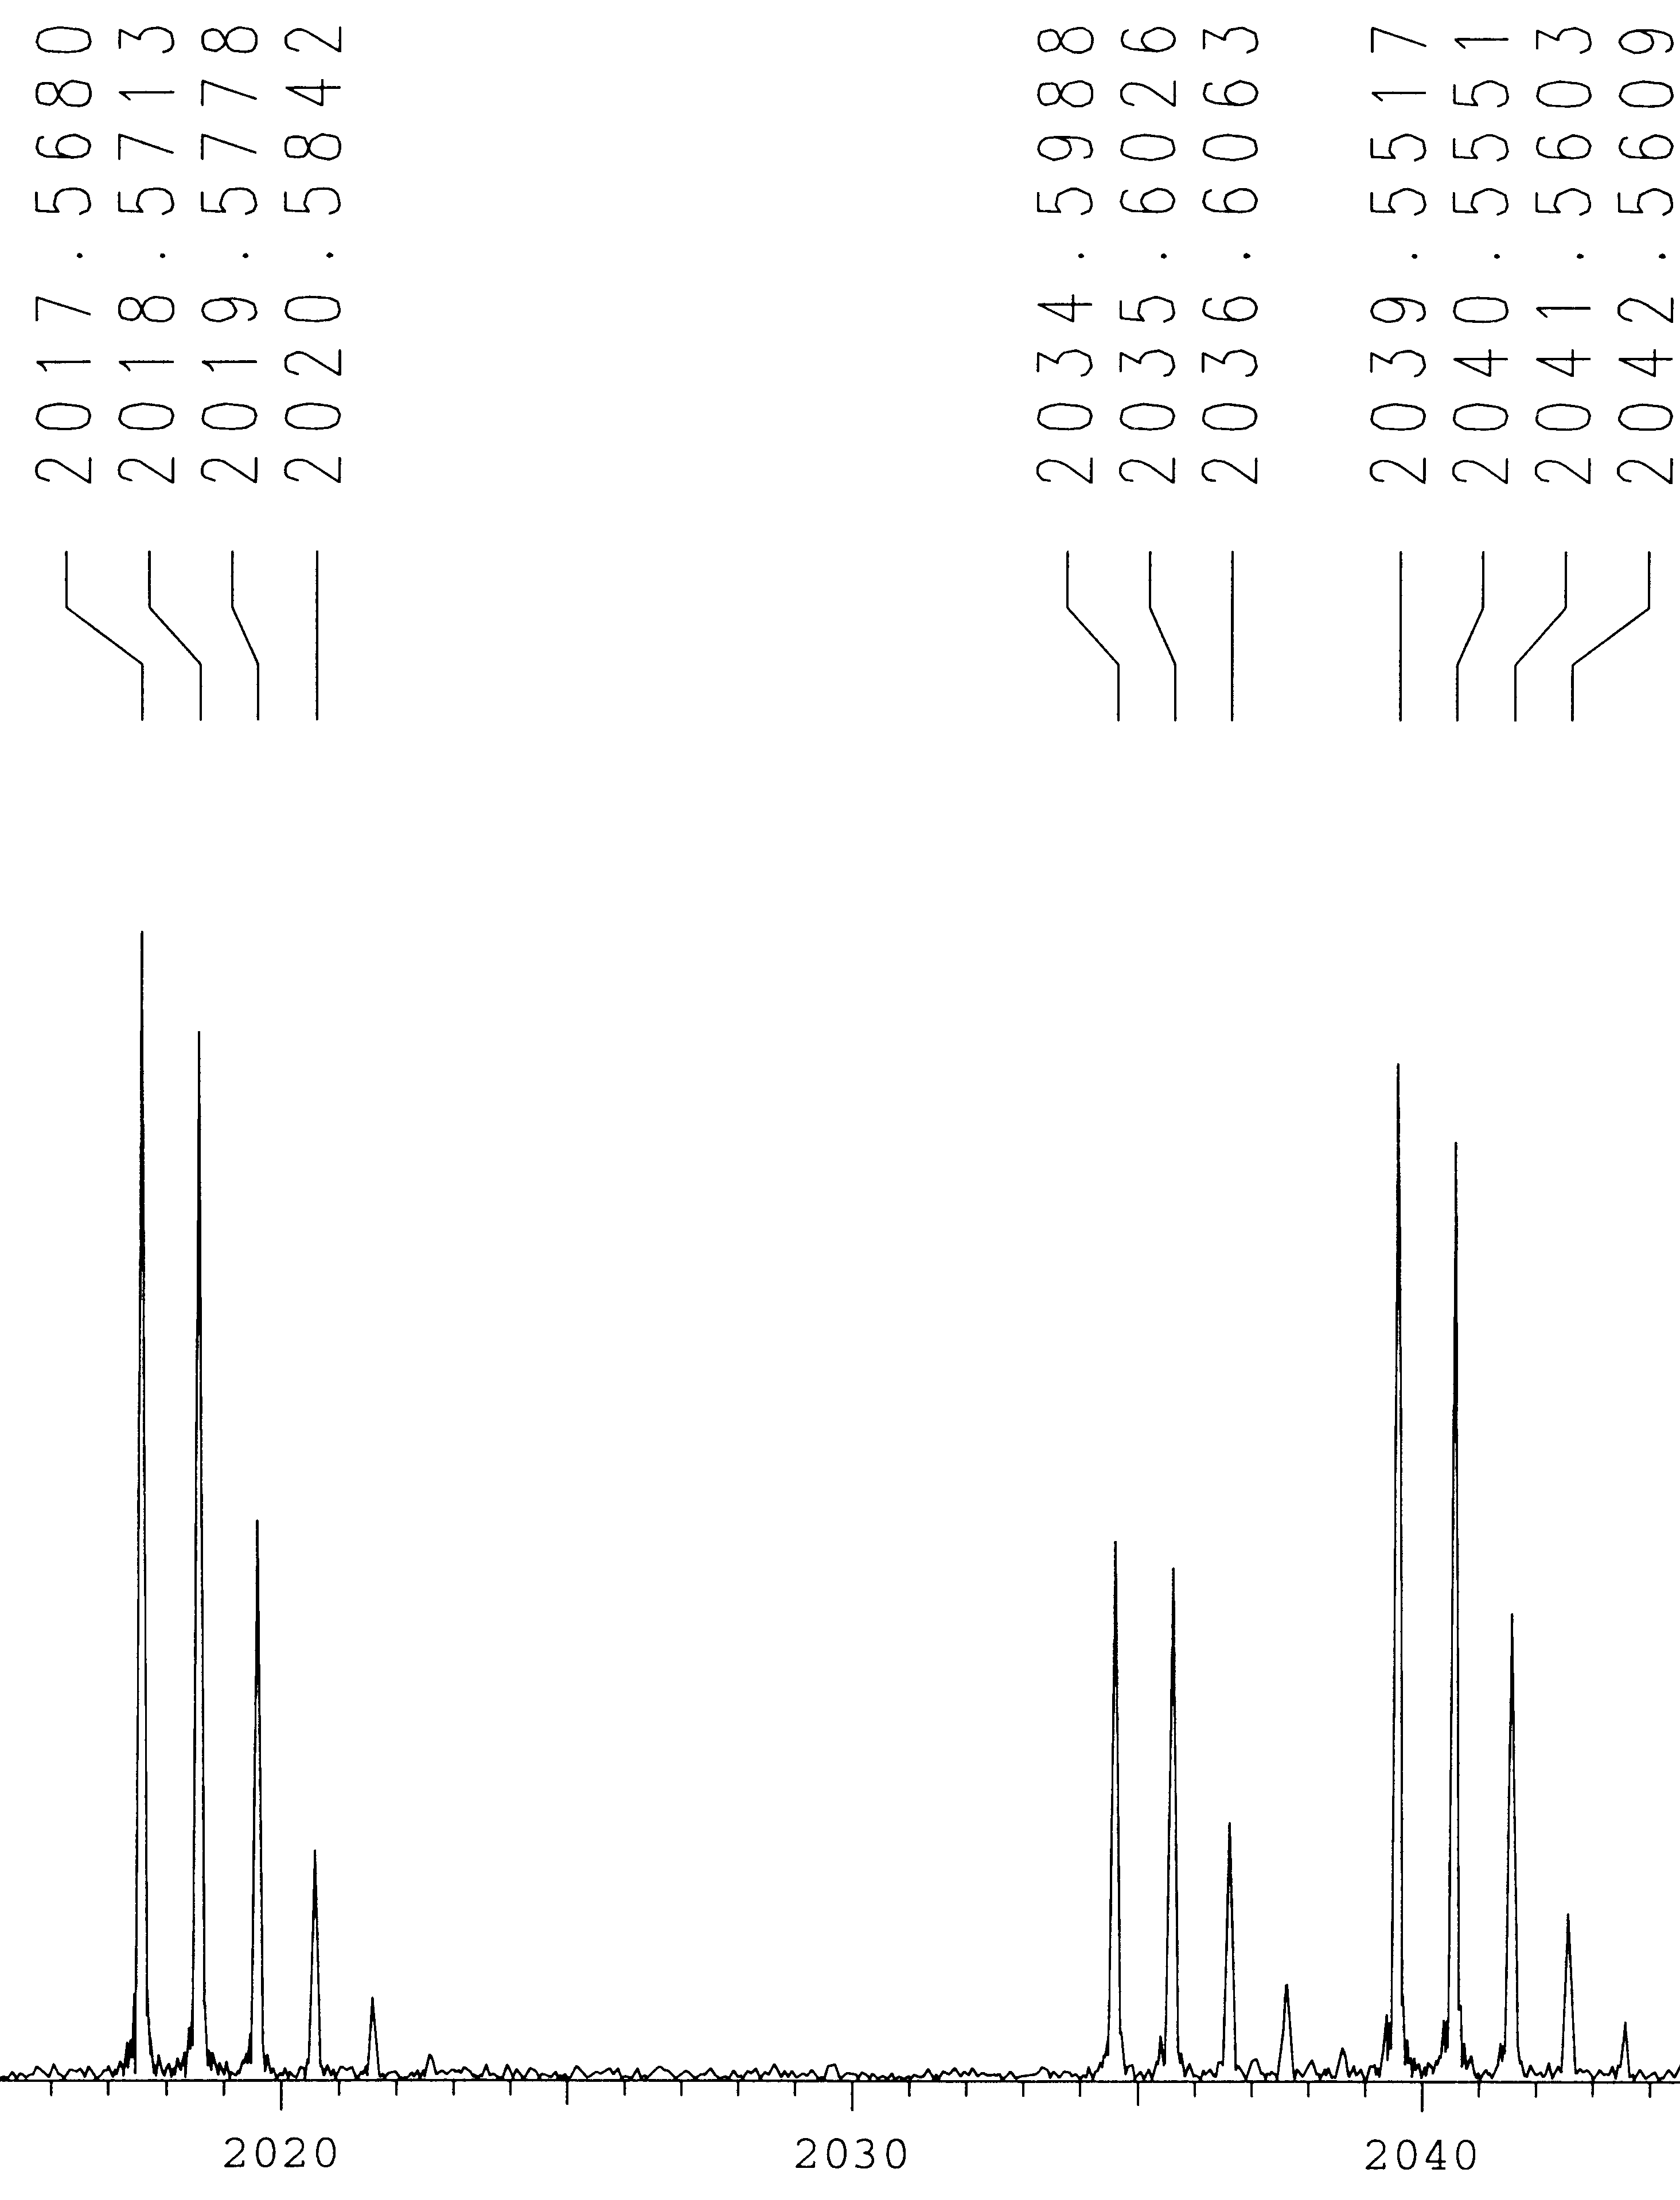


Positive Ion FAB Mass Spectrum of peracetylated-**-cyclodextrin. Expected masses [M+H]+ =2017.59; [M+Na]+=2039.58; [M+NH4]+= 2034.62.

(R)-**3**

(S)-**1**

(R)-**1**

(S)-**3**

(R)-**3**

(S)-**1**

(R)-**1**

(R)-**3**

(S)-**1**

(R)-**1**

**Fig. a Fig. b Fig. c**

Gas-chromatographic separation of the enantiomers of both substrate (**1**) and product (**3**) on heptakis-(2,3-di-*O*-methyl-6-*O*-tert-butyldimethylsilyl)-**-cyclodextrin of the co-lyophilized PSL with peracetylated-**-cyclodextrin-catalyzed transesterification of (**1**)in toluene at t=1 hr. **Fig. a**: 1:1 enzyme/Ac-**-cyclodextrin weight ratio, ees =4.5%, eep=99%, conv. =4.5%, E >100; **Fig. b**: 1:2 enzyme/Ac-**-cyclodextrin weight ratio, ees=5%, eep =99%, conv. =5%, E>100; **Fig. c**: 1:6 enzyme/Ac-**-cyclodextrin weight ratio, ees =25%, eep=99%, conv. =20%, E>100. The retention time of (S)-**3**, (R)-**1**, (S)-**1**, (R)-**3**, were 14.7, 15.5, 16.8, 20.2 min, respectively.

(S)-**1**

(R)-**3**

(S)-**1**

(R)-**1**

(R)-**3**

(R)-**1**

(S)-**1**

(R)-**3**

(S)-**3**

(R)-**1**

**Fig. a Fig. b Fig. c**

Gas-chromatographic separation of the enantiomers of both substrate (**1**) and product (**3**) on heptakis-(2,3-di-*O*-methyl-6-*O*-tert-butyldimethylsilyl)-**-cyclodextrin of the co-lyophilized PSL with peracetylated-**-cyclodextrin-catalyzed transesterification of (**1**)in toluene at t=2 hrs. **Fig.** **a:** 1:1 enzyme/Ac-**-cyclodextrin weight ratio, ees =7.3%, eep=96%, conv. =7%, E =54; **Fig.** **b:** 1:2 enzyme/Ac-**-cyclodextrin weight ratio, ees=9%, eep =99%, conv. =8%, E>100; **Fig. c**: 1:6 enzyme/Ac-**-cyclodextrin weight ratio, ees =70%, eep=98%, conv. =42%, E>100.

The retention time of (S)-**3**, (R)-**1**, (S)-**1**, (R)-**3**, were 14.7, 15.5, 16.8, 20.2 min, respectively.

(R)-**3**

(S)-**1**

(R)-**1**

(S)-**3**

(R)-**3**

(S)-**1**

(R)-**1**

(S)-**3**

(R)-**3**

(S)-**1**

(R)-**1**

(S)-**3**

**Fig. a Fig. b Fig. c**

Gas-chromatographic separation of the enantiomers of both substrate (**1**) and product (**3**) on heptakis-(2,3-di-*O*-methyl-6-*O*-tert-butyldimethylsilyl)-**-cyclodextrin of the co-lyophilized PSL with acetylated-**-cyclodextrin-catalyzed transesterification of (**1**)in toluene at t=6 hrs. **Fig. a**: 1:1 enzyme/Ac-**-cyclodextrin weight ratio, ees =8%, eep= 86%, conv. =9%, E =15; **Fig.** **b**: 1:2 enzyme/Ac-**-cyclodextrin weight ratio, ees=14%, eep = 84%, conv. =14%, E =13; **Fig. c**: 1:6 enzyme/Ac-**-cyclodextrin weight ratio, ees = 91.5%, eep=84.5%, conv. = 50%, E = 38

The retention time of (S)-**3**, (R)-**1**, (S)-**1**, (R)-**3**, were 14.7, 15.5, 16.8, 20.2 min, respectively.

(R)-**3**

(R)-**3**

(R)-**3**

(S)-**1**

(S)-**1**

(S)-**1**

(R)-**1**

(R)-**1**

(S)-**3**

(S)-**3**

(S)-**3**

**Fig. a Fig. b Fig. c**

Gas-chromatographic separation of the enantiomers of both substrate (**1**) and product (**3**) on heptakis-(2,3-di-*O*-methyl-6-*O*-tert-butyldimethylsilyl)-**-cyclodextrin of the co-lyophilized PSL with acetylated-**-cyclodextrin-catalyzed transesterification of (**1**)in toluene at t=8 hrs. **Fig.** **a**: 1:1 enzyme/Ac-**-cyclodextrin weight ratio, ees =14%, eep=94%, conv. =13%, E =39; **Fig. b**: 1:2 enzyme/Ac-**-cyclodextrin weight ratio, ees=14%, eep =94%, conv. =13%, E=38; **Fig. c**: 1:6 enzyme/Ac-**-cyclodextrin weight ratio, ees =99.9%, eep=79.1%, conv. =56%, E=88. The retention time of (S)-**3**, (R)-**1**, (S)-**1**, (R)-**3**, were 14.7, 15.5, 16.8, 20.2 min, respectively.
